# Supplementary material for: Characterization of black carbon-containing fine particles in Beijing during wintertime
Source: Copernicus journal article supplement (doi:10.5194/acp-2018-800), 2018-08-31
Supplement: Supplementary file 1 [file acp-2018-800-supplement.pdf]

*Supplement of*

**Characterization of black carbon-containing fine particles  
in Beijing during wintertime**

Junfeng Wang<sup>1</sup>, Dantong Liu<sup>2</sup>, Xinlei Ge<sup>1\*</sup>, Yangzhou Wu<sup>1</sup>, Fuzhen Shen<sup>1</sup>, Mindong Chen<sup>1</sup>, Jian Zhao<sup>3,4</sup>, Conghui Xie<sup>3,4</sup>, Qingqing Wang<sup>3</sup>, Weiqi Xu<sup>3,4</sup>, Jie Zhang<sup>5</sup>, Jianlin Hu<sup>1</sup>, James Allan<sup>2,6</sup>, Rutambhara Joshi<sup>2</sup>, Pingqing Fu<sup>3</sup>, Hugh Coe<sup>2</sup> and Yele Sun<sup>3,4</sup>

<sup>1</sup>Jiangsu Key Laboratory of Atmospheric Environment Monitoring and Pollution Control, School of Environmental Science and Engineering, Nanjing University of Information Science and Technology, Nanjing 210044, China

<sup>2</sup>School of Earth and Environmental Sciences, University of Manchester, M13 9PL, Manchester, UK

<sup>3</sup>State Key Laboratory of Atmospheric Boundary Layer Physics and Atmospheric Chemistry, Institute of Atmospheric Physics, Chinese Academy of Sciences, Beijing 100029, China

<sup>4</sup>University of Chinese Academy of Sciences, Beijing 100049, China

<sup>5</sup>Atmospheric Sciences Research Center, University at Albany, State University of New York, NY, 12203, USA

<sup>6</sup>National Centre for Atmospheric Science, University of Manchester, M13 9PL, Manchester, UK

\*Corresponding author, Email: caxinra@163.com

Phone: +86-25-58731394

*For Atmospheric Chemistry & Physics*

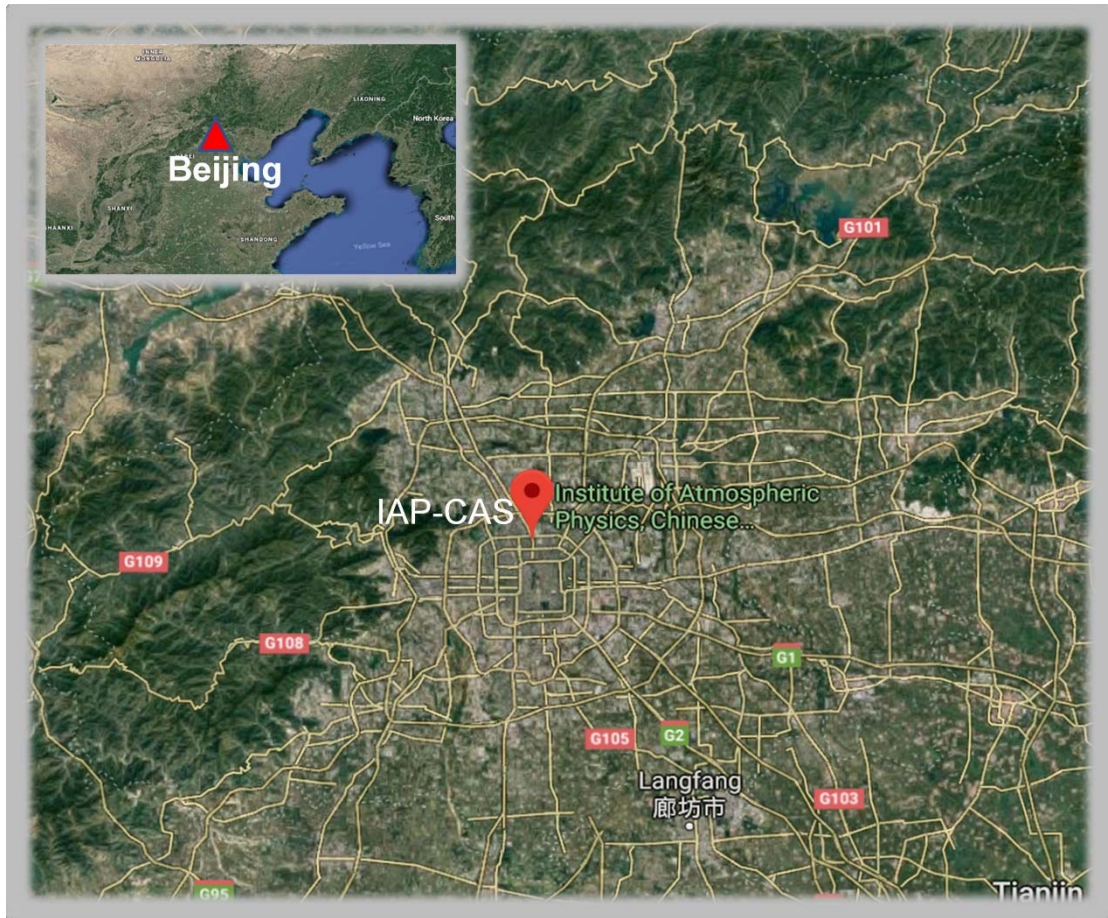

Figure S1. Map of the sampling site (IAP-Tower Division, CAS).

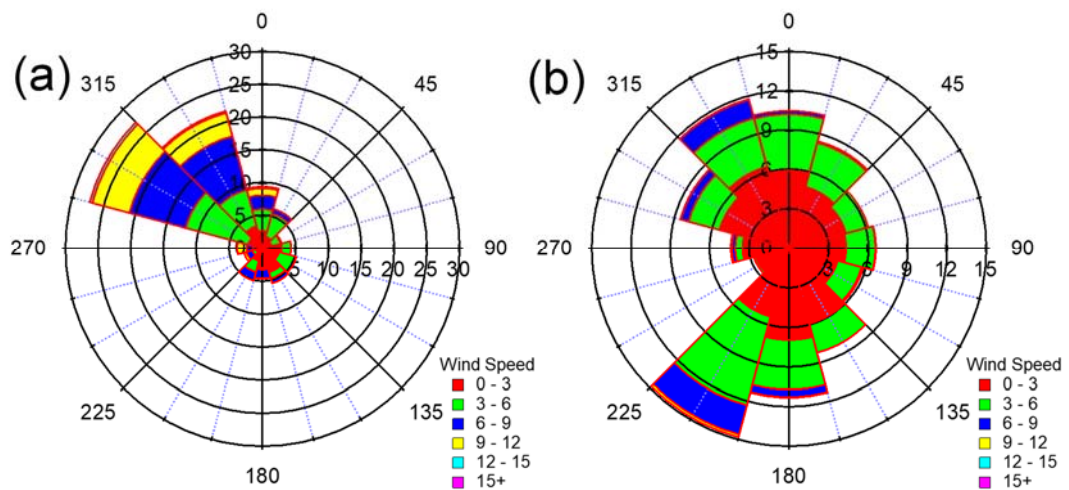

Figure S2. Rose-plots of wind direction and wind speed of (a) clean periods and (b) pollution periods.

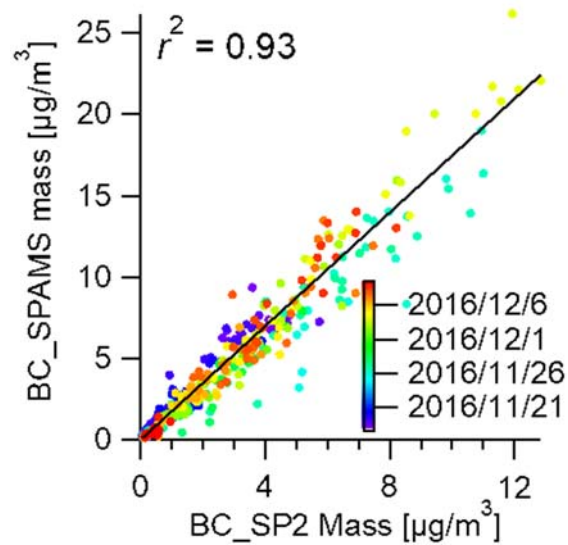

Figure S3. Scatter plots of SP-AMS measured BC vs. SP2 measured BC.

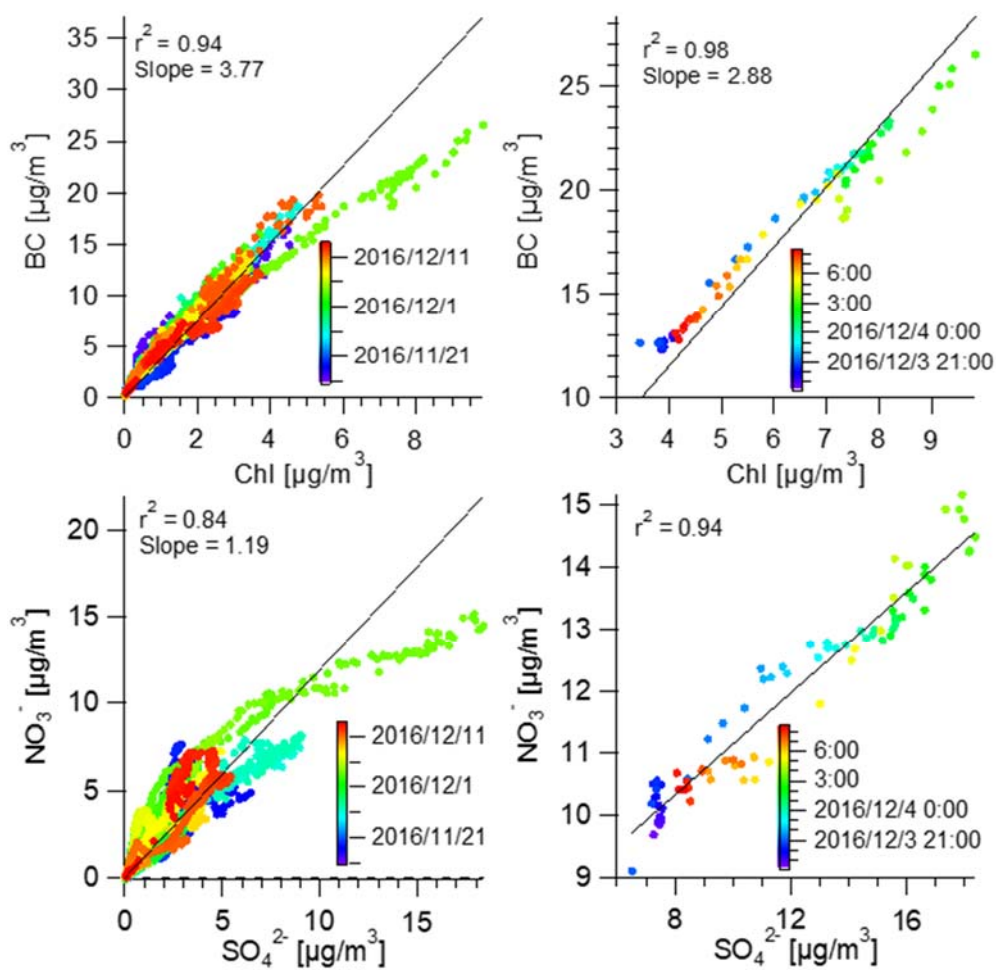

Figure S4. Scatter plots of BC vs. chloride, and nitrate vs. sulfate during the whole

campaign (left panel) and the first episode (FE) (right panel).

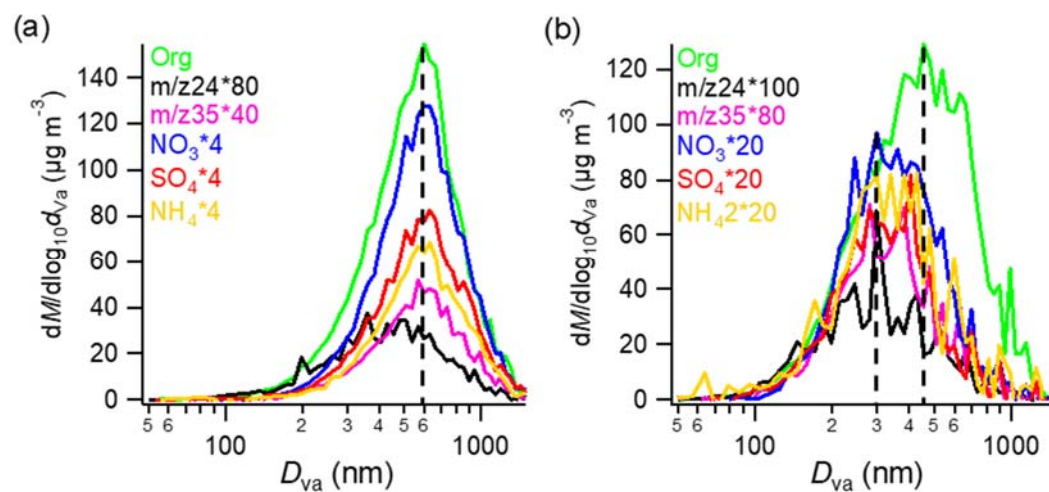

Figure S5. Mass-based average size distributions of BC cores and its coating components during (a) first episode (FE) and (b) second episode (SE).
